# Supplementary material
Source: PubMed Central journal article supplement (PMC4990315)
Supplement: la5b03841_si_001.pdf [file la5b03841_si_001.pdf]

## Modification of hydrophobic face of $\beta$ -sheet forming peptide: effect on self-assembly and gelation

Mohamed A. Elsaywy<sup>1,2</sup>, Andrew M. Smith<sup>1,2</sup>, Nigel Hodson<sup>3</sup>, Adam Squires<sup>4</sup>, Aline F. Miller<sup>2,5</sup>,  
Alberto Saiani<sup>1,2\*</sup>

### Electronic Supplementary Information

**ESI-MS:** The product identity was confirmed using a Waters LC-TOF mass spectrometer (+ve mode) coupled to an Alliance LC system using an injection flow of  $100\ \mu\text{l min}^{-1}$  and a mobile phase of 50 %  $\text{H}_2\text{O}$  / 50 %  $\text{CH}_3\text{CN}$  (0.1 % formic acid).

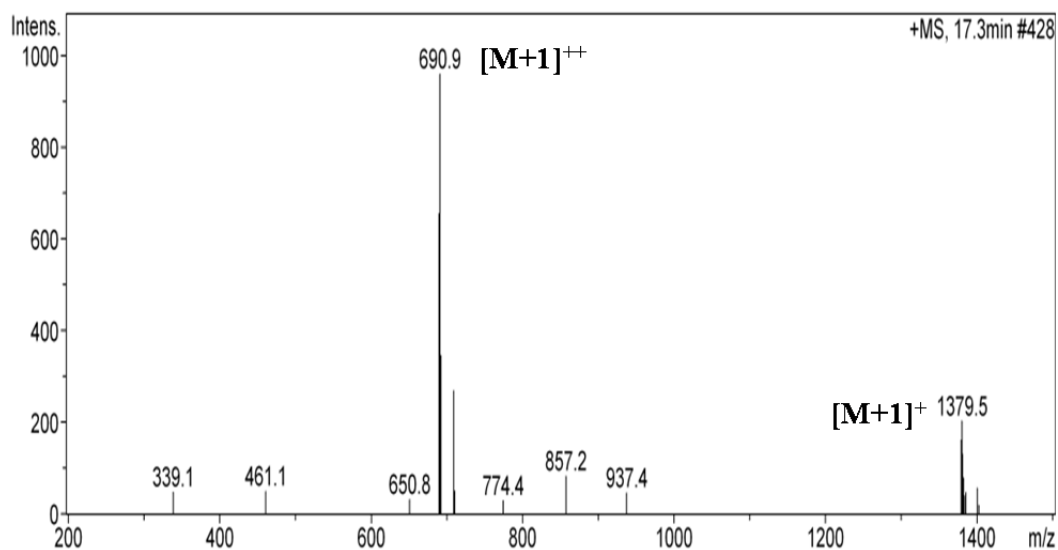

Figure ESI 1: ESI-MS trace for FC9-BM peptide (molar mass expected:  $1379.4\ \text{g mol}^{-1}$ )

**RP-HPLC:** The FC9-BM reaction mixture was freeze dried (79 mg; 94 % yield) and then dissolved in H<sub>2</sub>O (with 0.05 % TFA). An analytical scale Phenomenex Jupiter 4 $\mu$  Proteo column 90A° (250  $\times$  4.66 mm) was used with a flow rate of 1 ml min<sup>-1</sup>. An elution gradient of 90% H<sub>2</sub>O / 10% CH<sub>3</sub>CN to 30 % H<sub>2</sub>O / 70 % CH<sub>3</sub>CN (all solvents contained 0.05 % of TFA) over 45 min was used.

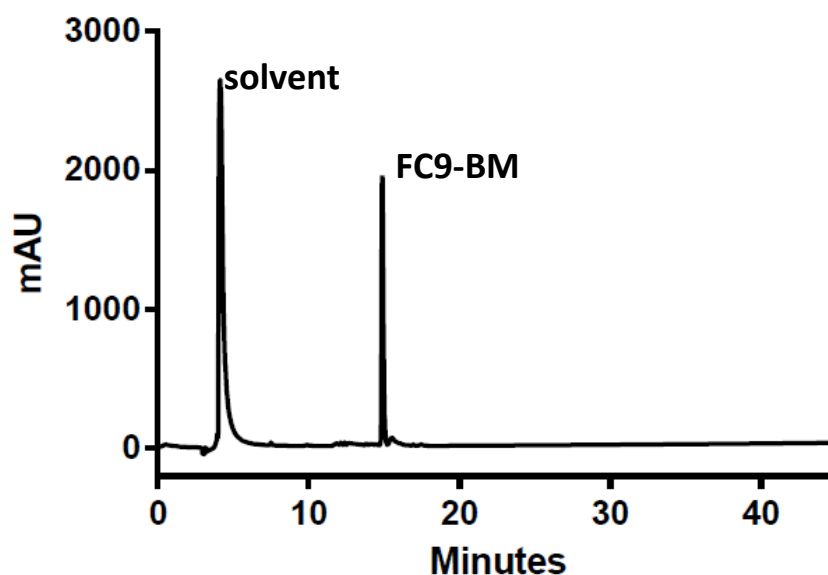

*Figure ESI 2: RP-HPLC trace for FC9-BM peptide (The retention time: 15.8 min.; Purity: 95 %).*
